# Supplementary material for: Launching deep subwavelength bulk plasmon polaritons through hyperbolic metamaterials for surface imaging with a tuneable ultra-short illumination depth
Source: Royal Society of Chemistry journal article supplement (doi:10.1039/c6nr03313j), 2016-01-01
Supplement: c6nr03313j1.pdf [file c6nr03313j1.pdf]

## Supplementary Information

### Launching deep subwavelength bulk plasmon polaritons through hyperbolic metamaterials for surface imaging with tuneable ultra-short illumination depth

Weijie Kong,<sup>a</sup> Wenjuan Du,<sup>a,b</sup> Kaipeng Liu,<sup>a</sup> Changtao Wang,<sup>a</sup> Ling Liu,<sup>a</sup> Zeyu Zhao,<sup>a</sup> and Xiangang Luo<sup>\*a</sup>

<sup>a</sup>State Key Laboratory of Optical Technologies on Nano-Fabrication and Micro-Engineering, Institute of Optics and Electronics, Chinese Academy of Science, P.O. Box 350, Chengdu 610209, China.

<sup>b</sup>University of Chinese Academy of Sciences, Beijing 100049, China.

\* Email address: [lxg@ioe.ac.cn](mailto:lxg@ioe.ac.cn)

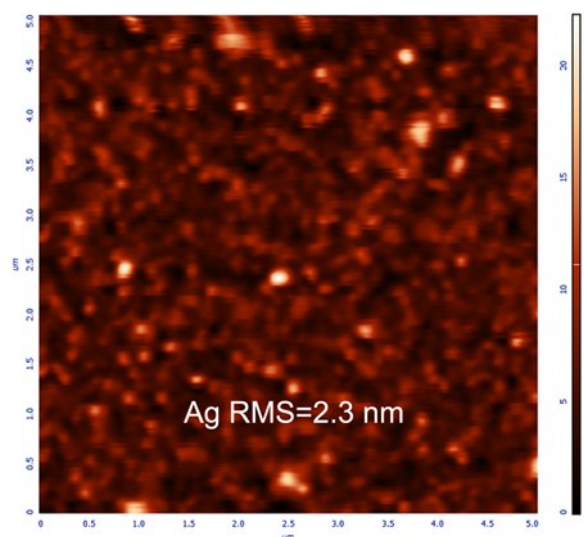

Fig. S1 The AFM measured morphology image of outmost Ag film of multilayer structure (RMS=2.3 nm).

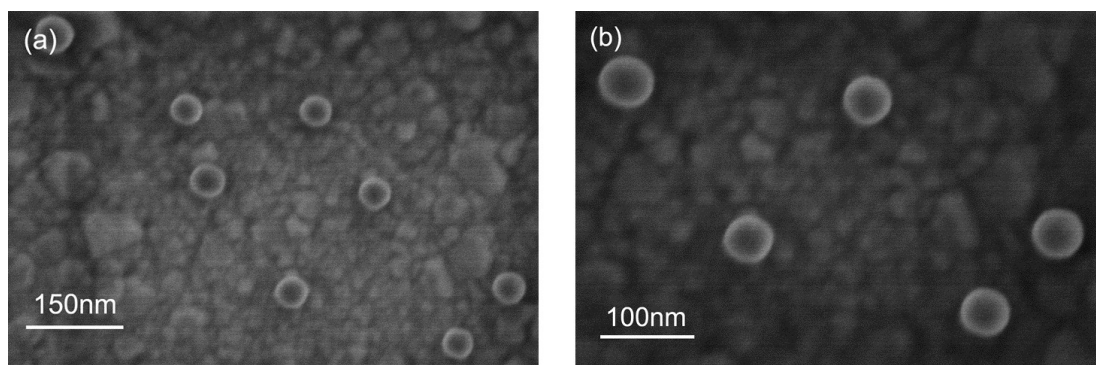

Fig. S2 The SEM images of the fluorescent nanoparticles above the outmost Ag film of multilayer structure with different scales.
